# Supplementary material for: Hydrostatic Pressure Sensing by WNK kinases
Source: PubMed Central journal article supplement — Mol Biol Cell. 2023 Sep 21;34(11):ar109. doi: 10.1091/mbc.E23-03-0113 (PMC10559305; doi:10.1091/mbc.e23-03-0113), 2023-09-21
Supplement: mbc-34-ar109-s001.pdf [file mbc-34-ar109-s001.pdf]

Supplementary Materials

*Molecular Biology of the Cell*

Humphreys *et al.*

# Hydrostatic Pressure Sensing by WNK Kinases

John M. Humphreys<sup>a</sup>, Liliana R. Teixeira<sup>a</sup>, Radha Akella<sup>a</sup>, Haixia He<sup>a</sup>, Ashari R. Kannangara<sup>a</sup>, Kamil Sekulski<sup>a</sup>, John Pleinis<sup>b</sup>, Joanna Liwocha<sup>a</sup>, Jenny Jiou<sup>a</sup>, Kelly A. Servage<sup>c</sup>, Kim Orth<sup>c</sup>, Lukasz Joachimiak<sup>d</sup>, Josep Rizo<sup>a</sup>, Melanie H. Cobb<sup>e</sup>, Chad A. Brautigam<sup>a,f</sup>, Aylin R. Rodan<sup>b</sup>, and Elizabeth J. Goldsmith<sup>a\*</sup>

<sup>a</sup> Department of Biophysics, The University of Texas Southwestern Medical Center, 5323 Harry Hines Boulevard, Dallas, TX 75390-8816, USA., <sup>b</sup> Department of Internal Medicine, Division of Nephrology and Hypertension and Department of Human Genetics, University of Utah, 15 North 2030 East, Salt Lake City UT 84112, <sup>c</sup> Department of Molecular Biology, <sup>d</sup> Center for Alzheimer's and Neurodegenerative Diseases, <sup>e</sup> Department of Pharmacology, <sup>f</sup> Department of Microbiology, University of Texas Southwestern Medical Center, 5323 Harry Hines Boulevard, Dallas, Texas 75390.

\*Correspondence to: [Elizabeth.Goldsmith@UTSouthwestern.edu](mailto:Elizabeth.Goldsmith@UTSouthwestern.edu)

## **This file includes:**

Supplemental Figures S1-S5

Extended Data Tables S1-S6

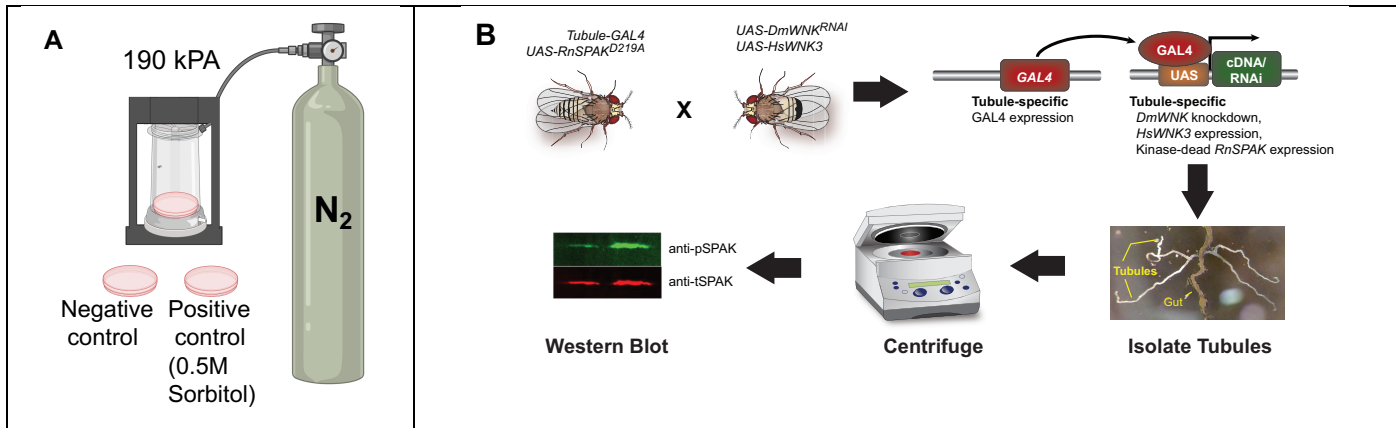

**Figure S1.** Measuring WNK activity in vivo. (A) Scheme for applying pressure to MDAMB231 cells using N<sub>2</sub> gas. Western blots for tKCC2 and pKCC2 were conducted for the pressurized cells and the positive and negative controls. (B) WNK3 expressed in *D. melanogaster* Malpighian tubules. The GAL4/UAS system was used to knock down endogenous *Drosophila* WNK in the fly Malpighian (renal) tubule and replace it with full-length human WNK3. Kinase-dead SPAK/D219A was coexpressed using the cell-specific driver c42-GAL4. Tubules were isolated and pressure applied by centrifugation. SPAK phosphorylation was quantified by using anti-pSPAK and anti-tSPAK antibodies. Band intensities were quantified using ImageJ. The effect of temperature was controlled for by imposing similar temperature increase to control tubules in a PTC-100 Programmable Thermal Controller.

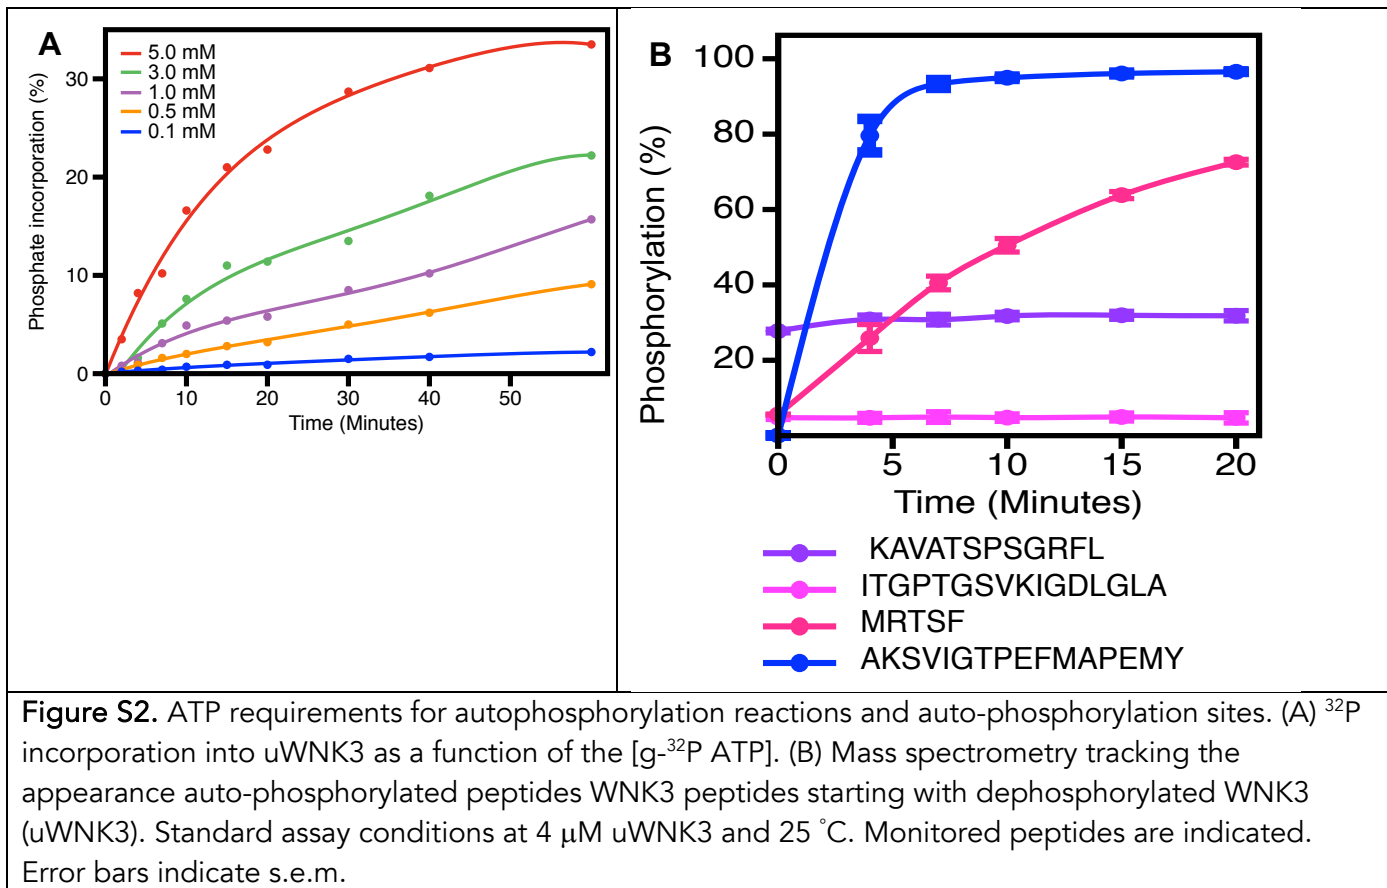

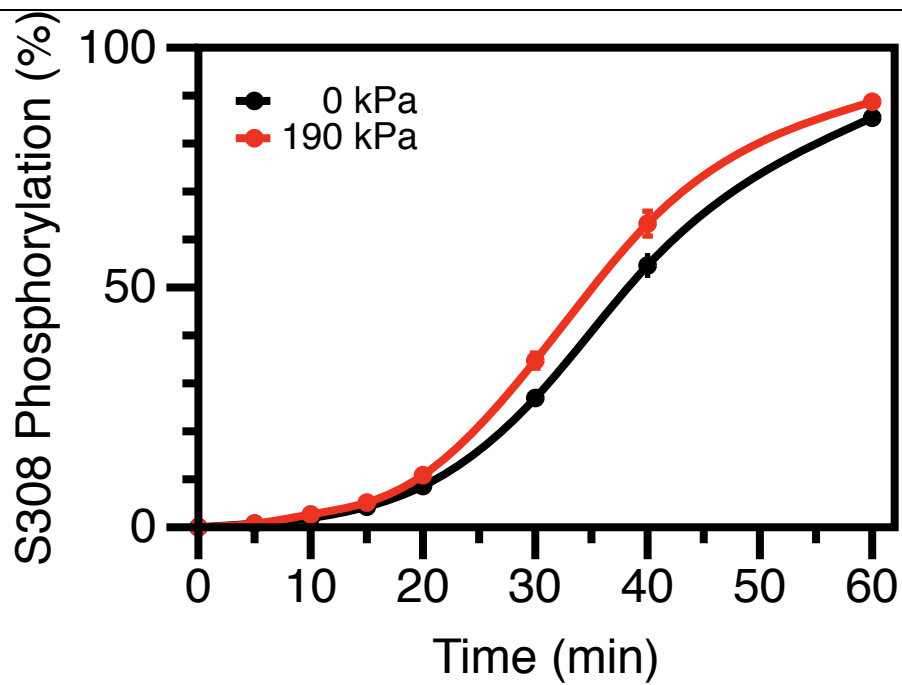

**Figure S3.** Triplicated hydrostatic pressure assay. Assay of 10  $\mu$ M uWnk3 for hydrostatic pressure. Assay conditions as in Figure 3. Data points represent mean value. Two-tailed t-test for the 30 minute time point gives  $p=.0043$  for the triplicated data. Error bars indicate s.e.m.

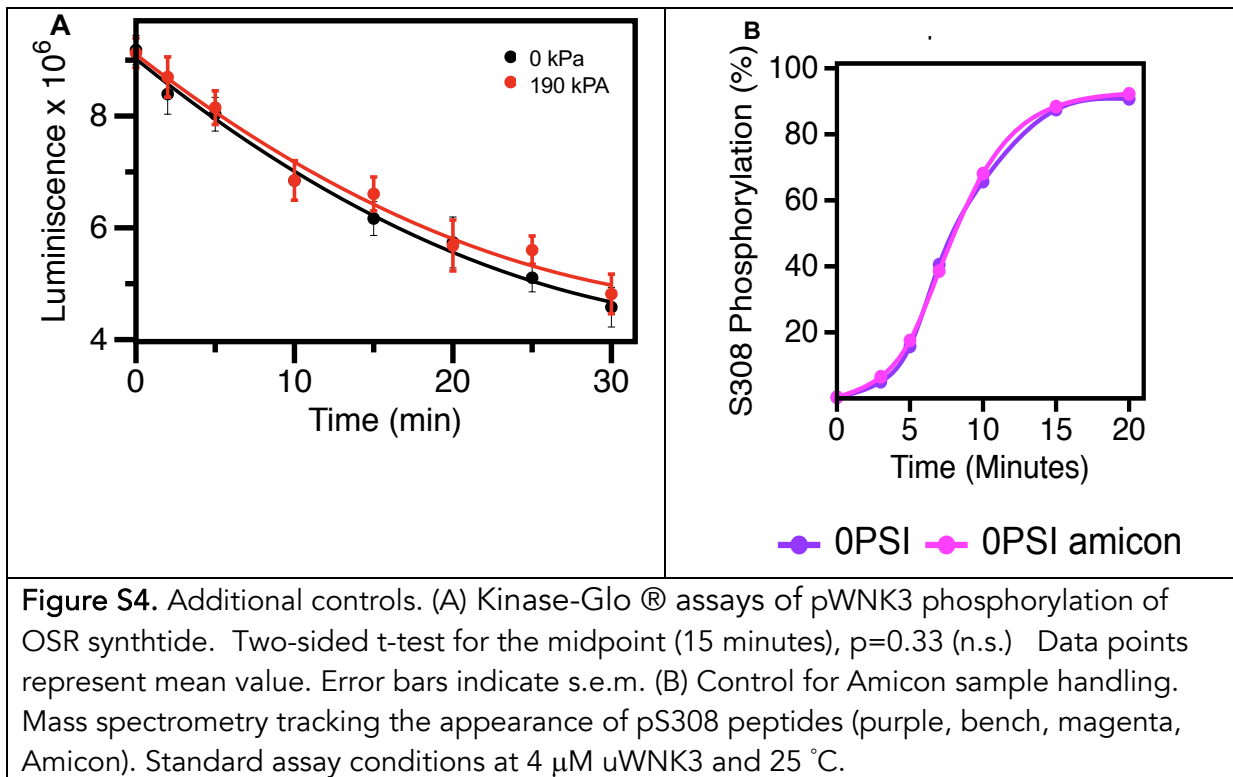

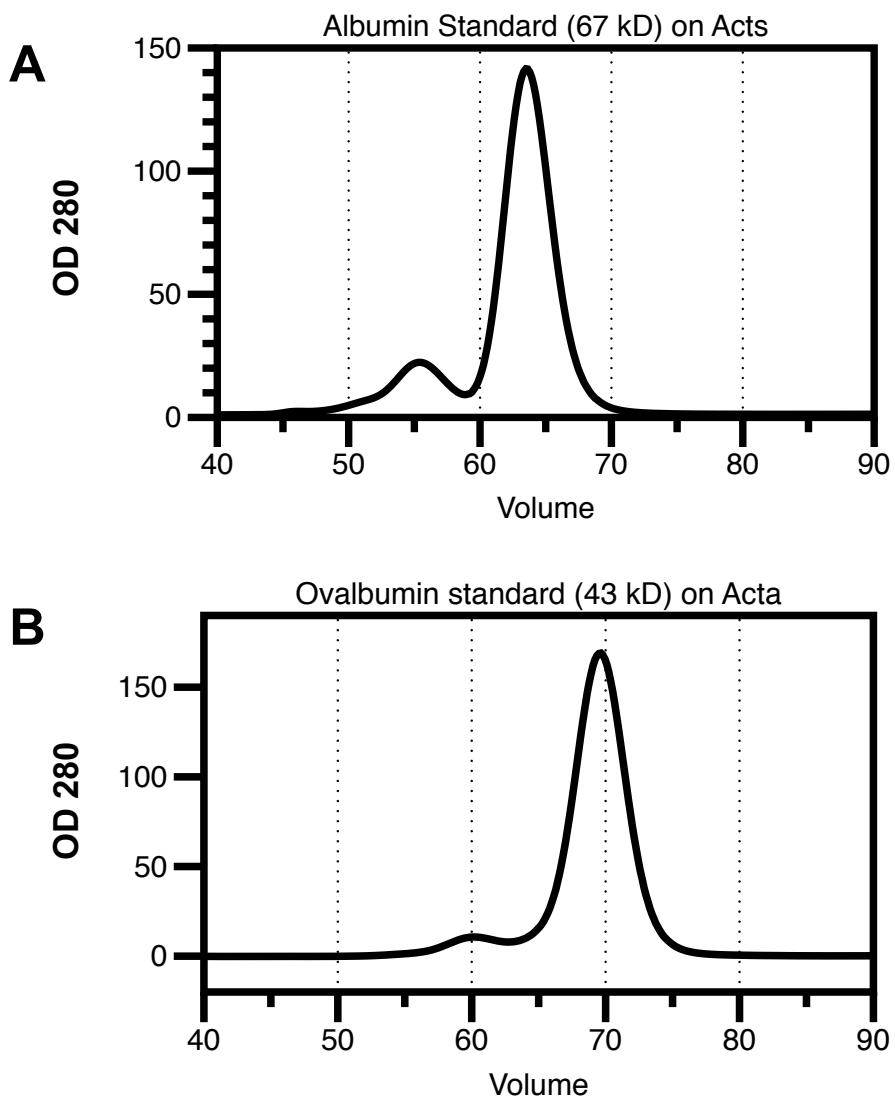

**Figure S5.** Gel filtration standards. (A) 67 kDa Albumin. (B) 43 kDa ovalbumin. Chromatography on an Acta FPLC using a Superdex S75 column at 290 kPa. Data compared to the uWNK3 elution volume on the same column in Figure 4A (second panel).

**Table S1.** Statistics for cellular assays in MDAMB231 cells

|                                 | +Pressure       | 0.5M Sorbitol     |
|---------------------------------|-----------------|-------------------|
| Theoretical mean                | 1.000           | 1.000             |
| Actual mean                     | 2.062           | 2.218             |
| Number of values                | 3               | 3                 |
| One sample t test               |                 |                   |
| t, df (degrees of freedom)      | t=10.90, df=2   | t=3.997, df=2     |
| P value (two tailed)            | 0.0083          | 0.0573            |
| P value summary                 | **              | ns                |
| Significant (alpha=0.05)?       | Yes             | No                |
| How big is the discrepancy?     |                 |                   |
| Discrepancy                     | 1.062           | 1.218             |
| SD of discrepancy               | 0.1687          | 0.5278            |
| SEM of discrepancy              | 0.09738         | 0.3047            |
| 95% confidence interval         | 0.6425 to 1.481 | -0.09309 to 2.529 |
| R squared (partial eta squared) | 0.9834          | 0.8887            |

|                                     |               |
|-------------------------------------|---------------|
| Unpaired t test                     |               |
| P value                             | 0.008         |
| P value summary                     | *             |
| Significantly different (P < 0.05)? | Yes           |
| One- or two-tailed P value?         | Two-tailed    |
| t, df                               | t=3.997, df=4 |



**Table S2.** DynaFit script for autocatalytic autophosphorylation model

```
[task]
  data = progress
  task = fit
[mechanism]
  WNK3_u + WNK3_p --> WNK3_p + WNK3_p : kphos
[constants]
  kphos = 0.04 ??
[concentrations]
  WNK3_u = 5 ?? ; values used, 40, 20, 10, 5
  WNK3_p = 0.1 ??
[data]
  directory ./WNK3_Modeling_1/Data
  sheet data.csv
  column 2
  offset 1
  response WNK3_p = 1
[output]
  directory ./WNK3_Modelling_1/Output
[end]
```

**Table S3.** uWNK3 Oligomeric state by SLS, SEC-MALS and AUC

| Pressure            | [uWNK3] (mg/ml) | MW (kDa) |
|---------------------|-----------------|----------|
| SLS (Gravity)*      | 0.8-2.4         | 60-90    |
| SEC-MALS<br>250 kPa | 5.0             | 43-74    |
| AUC<br>9-19 MPa     | 0.8, 2.1        | 38.5     |

\*Data presented in (Akella *et al*, 2021)

**Table S4.** Apparent uWNK3 and pWNK3 molecular weights by gel filtration

| WNK3 protein | Pressure (kPa) | Elution Vol (EV) (mL) | Estimated MW (kDa) | Standard MW (kDa), EV (ml) | Ovalbumin (43 kDa) EV |
|--------------|----------------|-----------------------|--------------------|----------------------------|-----------------------|
| uWNK3        | Gravity        | 16.3                  | 60                 | 67, 16                     | 17                    |
| uWNK3        | 280            | 70.0                  | 40                 | 67, 63.4                   | 69.6                  |
| pWNK3        | 290            | 64.5                  | 43                 | 80, 56.6                   | 64.5                  |

**Table S5.** DSS Crosslinks in uWNK3 without added pressure observed by mass spectrometry

| Peptide 1                   | Peptide 2            | Res. no. x-link Peptide A |      | Res. no. x-link Peptide B |      | Score |
|-----------------------------|----------------------|---------------------------|------|---------------------------|------|-------|
|                             |                      | WNK3                      | WNK1 | WNK3                      | WNK1 |       |
| FAEDTKLPTTENLY (tag)        | AEDTKLPTTENLY (tag)  | 410                       | 484  | 410                       | 484  | 22.3  |
| AEDTKLPTTENLY (tag)         | KGLDTETW             | 410                       | 484  | 163                       | 237  | 21.1  |
| AKSVIGTPEFMAPEMY            | AEDTKLPTTENLY (tag)  | 307                       | 381  | 410                       | 484  | 20.1  |
| AEDTKLPTTENLY (tag)         | AKSVIGTPEF           | 410                       | 484  | 307                       | 381  | 17.1  |
| FAEDTKLPTTENLY (tag)        | FAEDTKLPTTENLY (tag) | 410                       | 484  | 410                       | 484  | 15.5  |
| DSWESILKGGKCIVLVTELMSTGLKTY | KTVYKGLDTETWVEVAW    | 218                       | 292  | 159                       | 233  | 14.7  |
| AKSVIGTPEF                  | KGLDTETW             | 307                       | 381  | 163                       | 237  | 14.6  |
| AEDTKLPTTENLYF (tag)        | AEDTKLPTTENLY (tag)  | 410                       | 484  | 410                       | 484  | 12.5  |
| KGLDTETW                    | KGLDTETW             | 163                       | 237  | 163                       | 237  | 12.4  |
| RKVTSGIKPASF                | RKVTSGIKPASF         | 360                       | 434  | 360                       | 434  | 11.7  |
| KVXKPKVLRSW                 | KGLDTETW             | 248                       | 322  | 163                       | 237  | 10.4  |
| AEDTKLPTTENLYF (tag)        | CRQILKGLQF           | 410                       | 484  | 259                       | 333  | 9.3   |
| AKSVIGTPEFMAPEMY            | LKFDIELGRGAFKTVY     | 307                       | 381  | 148                       | 222  | 9.2   |
| LKFDIELGRGAF                | CRQILKGLQF           | 148                       | 222  | 259                       | 333  | 8.7   |
| LKRFKVXKPKVLRSW             | AEDTKLPTTENLYF (tag) | 243                       | 317  | 410                       | 484  | 7.5   |
| AKSVIGTPEFMAPEMYEEHY        | KEEAEXLKGLQHPNIVRF   | 307                       | 381  | 192                       | 266  | 6.5   |
| AKSVIGTPEFMAPEMY            | AKSVIGTPEFXAPEMY     | 307                       | 381  | 307                       | 381  | 5.9   |
| AKSVIGTPEFMAPEMYEEHY        | LKFDIELGRGAFKTVY     | 307                       | 381  | 159                       | 233  | 4.1   |

**Table S6.** DSS Crosslinks in uWNK3 under 190 kPa observed by mass spectrometry

| Peptide 1                          | Peptide 2             | P-site res. no.<br>Peptide A |      | P-site res. no.<br>Peptide B |      | Score |
|------------------------------------|-----------------------|------------------------------|------|------------------------------|------|-------|
|                                    |                       | WNK3                         | WNK1 | WNK3                         | WNK1 |       |
| KGLDTETW                           | KGLDTETW              | 163                          | 237  | 163                          | 237  | 29.5  |
| FAEDTKLPTTENLY (tag)               | FAEDTKLPTTENLY (tag)  | 410                          | 484  | 410                          | 484  | 21.0  |
| AEDTKLPTTENLY (tag)                | AKSVIGTPEF            | 410                          | 484  | 307                          | 381  | 20.3  |
| FAEDTKLPTTENLY (tag)               | AEDTKLPTTENLY (tag)   | 410                          | 484  | 410                          | 484  | 18.4  |
| AKSVIGTPEFMAPEMY                   | AEDTKLPTTENLY (tag)   | 307                          | 381  | 410                          | 484  | 18.2  |
| AEDTKLPTTENLY (tag)                | KGLDTETW              | 410                          | 484  | 163                          | 237  | 16.4  |
| AEDTKLPTTENLY (tag)                | AEDTKLPTTENLY (tag)   | 410                          | 484  | 410                          | 484  | 16.2  |
| KGLDTETWVEVAW                      | AKSVIGTPEF            | 163                          | 237  | 307                          | 381  | 14.8  |
| KEEAEXLKGLQHPNIVRFY                | DIELGRGAFKTVY         | 192                          | 266  | 159                          | 233  | 13.3  |
| KEKNEKEMEEEEAKAVATSPSGRF           | CRQILKGLQF            | 122                          | 196  | 259                          | 333  | 11.0  |
| KTVYKGLDTETW                       | RKVTSGIKPASF          | 163                          | 237  | 360                          | 434  | 10.6  |
| KGLDTETWVEVAW                      | KGLDTETW              | 163                          | 237  | 163                          | 237  | 10.1  |
| AEDTKLPTTENLYF (tag)               | AEDTKLPTTENLYF (tag)  | 410                          | 484  | 410                          | 484  | 10.1  |
| AEDTKLPTTENLY (tag)                | LKFDIELGRGAF          | 410                          | 484  | 148                          | 222  | 8.5   |
| DIELGRGAFKTVY                      | KVMKPKVLRSW           | 159                          | 233  | 243                          | 317  | 8.5   |
| DSWESILKGKCCIVLVTTELMTSGTLKTY      | CRQILKGLQF            | 236                          | 310  | 259                          | 333  | 6.7   |
| CELQDRKLTKAEQQRFKEEAEMLKGLQHPNIVRF | KEEAEMLKGLQHPNIVRFYDW | 185                          | 259  | 192                          | 266  | 6.6   |
| SECQNAAQYRKVTSGIKPASF              | CRQILKGLQ             | 360                          | 434  | 259                          | 333  | 5.9   |
| ESILKGKCCIVLVTTELMTSGTLKTYLKRF     | CRQILKGLQF            | 221                          | 295  | 259                          | 333  | 5.7   |
| AKSVIGTPEFMAPEMY                   | RKVTSGIKPASF          | 307                          | 381  | 360                          | 434  | 5.6   |
| AKSVIGTPEFMAPEXEEHY                | LKFDIELGRGAFKTVY      | 307                          | 381  | 148                          | 222  | 4.9   |
| ITGPTGSVKIGDLGLATLMRTSF            | KTVYKGLDTETWVEVAW     | 291                          | 365  | 163                          | 237  | 4.4   |
| FAEDTKLPTTENLY (tag)               | AKSVIGTPEF            | 410                          | 484  | 307                          | 381  | 3.9   |
| ESILKGKCCIVLVTTELMTSGTLKTY         | LKFDIELGRGAF          | 236                          | 310  | 148                          | 222  | 3.9   |
| ESILKGKCCIVLVTTELMTSGTLKTY         | DIELGRGAFKTVY         | 236                          | 310  | 159                          | 233  | 2.7   |

## REFERENCES

Akella, R., Humphreys, J.M., Sekulski, K., He, H., Durbacz, M., Chakravarthy, S., Liwocha, J., Mohammed, Z.J., Brautigam, C.A., and Goldsmith, E.J. (2021). Osmosensing by WNK Kinases. *Mol Biol Cell* 32, 1614-1623.
